# Supplementary material for: Role of D-aminoacyl-tRNA deacylase beyond chiral proofreading as a cellular defense against glycine mischarging by AlaRS
Source: eLife. 2017 Mar 31;6:e24001. doi: 10.7554/eLife.24001 (PMC5409826; doi:10.7554/eLife.24001)
Supplement: Figure 2—source data 1. — DOI: http://dx.doi.org/10.7554/eLife.24001.005 [file elife-24001-fig2-data1.xlsx]

## Sheet: Figure 2A-source data1
Figure 2A-source data 1
									Average
Time (min)	L-Ala+Buffer_1	L-Ala+Buffer_2	L-Ala+Buffer_3	Average	Std. Dev.			Time (min)	L-Ala+Buffer	L-Ala+EcAlaRS	L-Ala+EcAlaRS+EcDTD	L-Ser+EcAlaRS	L-Ser+EcAlaRS+EcDTD	Gly+EcAlaRS	Gly+EcAlaRS+EcDTD
0	0	0	0	0	0			0	0	0	0	0	0	0	0
2	0.39	0.31	0.45	0.383333	0.0702377			2	0.383333	34.0133	32.2867	8.30667	4.22333	16.1833	1.76667
5	0.21	0.24	0.36	0.27	0.0793725			5	0.27	43.6967	44.7867	11.0333	6.55	21.0233	1.85
10	0.2	0.15	0.34	0.23	0.0984886			10	0.23	48.9933	52.3833	10.8667	11.2567	27.9133	1.515
15	0.27	0.35	0.58	0.4	0.160935			15	0.4	51.7	51.39	13.46	12.0633	29.1433	1.17
									Std.Dev
Time (min)	L-Ala+EcAlaRS_1	L-Ala+EcAlaRS_2	L-Ala+EcAlaRS_3	Average	Std. Dev.				L-Ala+Buffer	L-Ala+EcAlaRS	L-Ala+EcAlaRS+EcDTD	L-Ser+EcAlaRS	L-Ser+EcAlaRS+EcDTD	Gly+EcAlaRS	Gly+EcAlaRS+EcDTD
0	0	0	0	0	0				0	0	0	0	0	0	0
2	31.92	36.57	33.55	34.0133	2.35937				0.0702377	2.35937	5.50627	1.11648	0.827788	0.823671	0.161658
5	43.07	42.2	45.82	43.6967	1.88961				0.0793725	1.88961	5.27481	1.95679	0.517977	3.03991	0.53
10	47.25	49.99	49.74	48.9933	1.51494				0.0984886	1.51494	1.3989	0.774231	2.81995	2.10308	0.325
15	50.08	52.51	52.51	51.7	1.40296				0.160935	1.40296	1.04096	1.08282	1.42858	2.04688	0.16
Time (min)	L-Ala+EcAlaRS+EcDTD_1	L-Ala+EcAlaRS+EcDTD_2	L-Ala+EcAlaRS+EcDTD_3	Average	Std. Dev.
0	0	0	0	0	0
2	31.38	27.29	38.19	32.2867	5.50627
5	40.85	42.73	50.78	44.7867	5.27481
10	50.79	52.95	53.41	52.3833	1.3989
15	50.19	52.05	51.93	51.39	1.04096
Time (min)	L-Ser+EcAlaRS_1	L-Ser+EcAlaRS_2	L-Ser+EcAlaRS_3	Average	Std. Dev.
0	0	0	0	0	0
2	9.02	7.02	8.88	8.30667	1.11648
5	13.21	9.42	10.47	11.0333	1.95679
10	11.76	10.39	10.45	10.8667	0.774231
15	12.86	14.71	12.81	13.46	1.08282
Time (min)	L-Ser+EcAlaRS+EcDTD_1	L-Ser+EcAlaRS+EcDTD_2	L-Ser+EcAlaRS+EcDTD_3	Average	Std. Dev.
0	0	0	0	0	0
2	3.59	5.16	3.92	4.22333	0.827788
5	6.76	6.93	5.96	6.55	0.517977
10	14.25	10.87	8.65	11.2567	2.81995
15	12.18	13.43	10.58	12.0633	1.42858
Time (min)	Gly+EcAlaRS_1	Gly+EcAlaRS_2	Gly+EcAlaRS_3	Average	Std. Dev.
0	0	0	0	0	0
2	15.24	16.76	16.55	16.1833	0.823671
5	17.56	22.26	23.25	21.0233	3.03991
10	26.78	26.62	30.34	27.9133	2.10308
15	27.43	28.59	31.41	29.1433	2.04688
Time (min)	Gly+EcAlaRS+EcDTD_1	Gly+EcAlaRS+EcDTD_2	Gly+EcAlaRS+EcDTD_3	Average	Std. Dev.
0	0	0	0	0	0
2	1.86	1.58	1.86	1.76667	0.161658
5	2.38	1.32	1.85	1.85	0.53
10	1.19	1.515	1.84	1.515	0.325
15	1.33	1.17	1.01	1.17	0.16

## Sheet: Figure 2B-source data1
Figure 2B-source data 1						AE= Activated EF-Tu
						UE= Unactivated EF-Tu
Time (min)	UE-Buffer_1	UE-Buffer_2	UE-Buffer_3	Average	Std. Dev.					Time (min)	UE-Buffer	AE-Buffer	UE-EcDTD-5pM	AE-EcDTD-5pM
0	100	100	100	100	0					0	100	100	100	100
2	83.4985	75.2618	83.7777	80.846	4.83812					2	80.846	98.9241	23.5562	32.8261
5	77.4117	73.4888	82.8145	77.905	4.68238					5	77.905	97.1086	18.8143	27.1441
10	70.9758	66.9971	74.6615	70.8781	3.83313					10	70.8781	98.0035	15.2915	19.0516
15	58.5509	57.0431	63.814	59.8027	3.55479					15	59.8027	97.0842	14.5563	16.2781
Time (min)	AE-Buffer_1	AE-Buffer_2	AE-Buffer_3	Average	Std. Dev.						UE-Buffer	AE-Buffer	UE-EcDTD-5pM	AE-EcDTD-5pM
0	100	100	100	100	0						0	0	0	0
2	99.8036	97.6253	99.3434	98.9241	1.14809						4.83812	1.14809	10.8691	3.91606
5	100.253	96.4379	94.6354	97.1086	2.868						4.68238	2.868	8.72742	7.63319
10	98.5269	96.8107	98.6728	98.0035	1.03554						3.83313	1.03554	6.179	3.6443
15	96.7172	95.4853	99.05	97.0842	1.81047						3.55479	1.81047	5.33644	3.70672
Time (min)	UE-EcDTD-5pM_1	UE-EcDTD-5pM_2	UE-EcDTD-5pM_3	Average	Std. Dev.
0	100	100	100	100	0
2	26.4554	32.6818	11.5315	23.5562	10.8691
5	19.7403	27.0417	9.66076	18.8143	8.72742
10	14.5191	21.8205	9.53511	15.2915	6.179
15	13.6954	20.2708	9.70264	14.5563	5.33644
Time (min)	AE-EcDTD-5pM_1	AE-EcDTD-5pM_2	AE-EcDTD-5pM_3	Average	Std. Dev.
0	100	100	100	100	0
2	32.7935	28.9264	36.7583	32.8261	3.91606
5	27.4187	34.6363	19.3774	27.1441	7.63319
10	19.1261	22.6581	15.3707	19.0516	3.6443
15	16.2362	20.0056	12.5925	16.2781	3.70672

## Sheet: Figure 2-figure supplement 1
Figure 2-figure supplement 1-source data 1
Time (min)	L-Ala + EcoAlaRS-C666A	L-Ser + EcoAlaRS-C666A	Gly + EcoAlaRS-C666A
0	0	0	0
2	38	34.31	27.04
5	43.32	38.37	32.66
10	50.42	41.08	38.6
15	50.39	41.49	37.69
