# Supplementary material for: Role of D-aminoacyl-tRNA deacylase beyond chiral proofreading as a cellular defense against glycine mischarging by AlaRS
Source: eLife. 2017 Mar 31;6:e24001. doi: 10.7554/eLife.24001 (PMC5409826; doi:10.7554/eLife.24001)
Supplement: Figure 3—source data 1. — DOI: http://dx.doi.org/10.7554/eLife.24001.008 [file elife-24001-fig3-data1.xlsx]

## Sheet: Figure 3A-source data 1
Figure 3A-source data 1					AE= Activated EF-Tu
					UE= Unactivated EF-Tu
Time (min)	UE-Buffer_1	UE-Buffer_2	UE-Buffer_3	Average	Std. Dev.		Time (min)	UE-Buffer	UE-AlaRS-WT-10nM	UE-AlaRS-WT-50nM	UE-AlaRS-WT-100nM	UE-AlaRS-WT-500nM
0	100	100	100	100	0		0	100	100	100	100	100
2	94.4828	98	108.957	100.48	7.54904		2	100.48	16.1028	8.18151	5.81811	6.13376
5	81.9048	89.48	99.8266	90.4038	8.99658		5	90.4038	6.78483	5.41318	5.49596	4.8469
10	67.8161	74.24	78.9945	73.6835	5.60995		10	73.6835	4.80422	4.81439	4.90429	6.84994
15	58.1609	65.67	67.1193	63.6501	4.80867		15	63.6501	4.56586	4.11148	4.4284	7.30543
Time (min)	UE-AlaRS-WT-10nM_1	UE-AlaRS-WT-10nM_2	UE-AlaRS-WT-10nM_3	Average	Std. Dev.			UE-Buffer	UE-AlaRS-WT-10nM	UE-AlaRS-WT-50nM	UE-AlaRS-WT-100nM	UE-AlaRS-WT-500nM
0	100	100	100	100	0			0	0	0	0	0
2	14.5813	15.64	18.0873	16.1028	1.79823			7.54904	1.79823	1.36729	1.72037	1.54379
5	6.15764	5.76	8.43687	6.78483	1.44445			8.99658	1.44445	0.988594	1.03316	0.934578
10	4.40066	4.32	5.692	4.80422	0.769896			5.60995	0.769896	0.980417	0.669995	1.26592
15	4.28571	4.5	4.91188	4.56586	0.318234			4.80867	0.318234	0.477213	1.21479	1.09419
Time (min)	UE-AlaRS-WT-50nM_1	UE-AlaRS-WT-50nM_2	UE-AlaRS-WT-50nM_3	Average	Std. Dev.
0	100	100	100	100	0
2	6.68309	8.5	9.36146	8.18151	1.36729
5	4.31856	5.68	6.24097	5.41318	0.988594
10	3.92447	4.65333	5.86536	4.81439	0.980417
15	3.67816	4.03333	4.62294	4.11148	0.477213
Time (min)	UE-AlaRS-WT-100nM_1	UE-AlaRS-WT-100nM_2	UE-AlaRS-WT-100nM_3	Average	Std. Dev.
0	100	100	100	100	0
2	4.53202	5.15	7.77232	5.81811	1.72037
5	4.58128	5.29	6.61658	5.49596	1.03316
10	4.23645	4.9	5.57642	4.90429	0.669995
15	3.10345	4.692	5.48974	4.4284	1.21479
Time (min)	UE-AlaRS-WT-500nM_1	UE-AlaRS-WT-500nM_2	UE-AlaRS-WT-500nM_3	Average	Std. Dev.
0	100	100	100	100	0
2	4.81117	5.76	7.83011	6.13376	1.54379
5	4.54844	4.098	5.89425	4.8469	0.934578
10	8.29228	6.3344	5.92314	6.84994	1.26592
15	7.43	8.332	6.15429	7.30543	1.09419

## Sheet: Figure 3B-source data 1
Figure 3B-source data 1					AE= Activated EF-Tu
					UE= Unactivated EF-Tu
Time (min)	AE-Buffer_1	AE-Buffer_2	AE-Buffer_3	Average	Std. Dev.		Time (min)	AE-Buffer	AE-AlaRS-WT-10nM	AE-AlaRS-WT-50nM	AE-AlaRS-WT-100nM	AE-AlaRS-WT-500nM
0	100	100	100	100	0		0	100	100	100	100	100
2	99.8036	97.6253	99.3434	98.9241	1.14809		2	98.9241	88.3617	79.2359	51.4874	24.7866
5	100.253	96.4379	94.6354	97.1086	2.868		5	97.1086	83.6277	64.9081	31.5738	15.4967
10	98.5269	96.8107	98.6728	98.0035	1.03554		10	98.0035	76.0765	52.7714	19.044	11.822
15	96.7172	95.4853	99.05	97.0842	1.81047		15	97.0842	74.9895	43.7135	14.8601	14.5391
Time (min)	AE-AlaRS-WT-10nM_1	AE-AlaRS-WT-10nM_2	AE-AlaRS-WT-10nM_3	Average	Std. Dev.			AE-Buffer	AE-AlaRS-WT-10nM	AE-AlaRS-WT-50nM	AE-AlaRS-WT-100nM	AE-AlaRS-WT-500nM
0	100	100	100	100	0			0	0	0	0	0
2	84.1751	88.7754	92.1347	88.3617	3.99589			1.14809	3.99589	1.82917	1.31634	1.16002
5	82.3653	85.2961	83.2216	83.6277	1.50703			2.868	1.50703	2.73375	2.29613	0.332915
10	74.2424	73.6435	80.3437	76.0765	3.70756			1.03554	3.70756	1.82899	1.74169	2.50674
15	70.7211	76.4324	77.815	74.9895	3.76064			1.81047	3.76064	1.76515	2.3459	1.86749
Time (min)	AE-AlaRS-WT-50nM_1	AE-AlaRS-WT-50nM_2	AE-AlaRS-WT-50nM_3	Average	Std. Dev.
0	100	100	100	100	0
2	79.4332	77.316	80.9584	79.2359	1.82917
5	64.5623	62.3637	67.7983	64.9081	2.73375
10	50.7155	54.2179	53.3808	52.7714	1.82899
15	45.3563	41.8473	43.9369	43.7135	1.76515
Time (min)	AE-AlaRS-WT-100nM_1	AE-AlaRS-WT-100nM_2	AE-AlaRS-WT-100nM_3	Average	Std. Dev.
0	100	100	100	100	0
2	51.7256	50.0682	52.6683	51.4874	1.31634
5	31.0466	29.5872	34.0877	31.5738	2.29613
10	17.1016	19.5637	20.4666	19.044	1.74169
15	12.1633	15.9879	16.4292	14.8601	2.3459
Time (min)	AE-AlaRS-WT-500nM_1	AE-AlaRS-WT-500nM_2	AE-AlaRS-WT-500nM_3	Average	Std. Dev.
0	100	100	100	100	0
2	23.5971	25.9147	24.848	24.7866	1.16002
5	15.881	15.2975	15.3115	15.4967	0.332915
10	14.5062	11.4179	9.54177	11.822	2.50674
15	15.5443	12.3844	15.6887	14.5391	1.86749

## Sheet: Figure 3C-source data 1
Figure 3C-source data 1					AE= Activated EF-Tu
					UE= Unactivated EF-Tu
Time (min)	AE-Buffer_1	AE-Buffer_2	AE-Buffer_3	Average	Std. Dev.		Time (min)	AE-Buffer	AE-EcDTD	AE-EcDTD+AlaRS-WT-10nM	AE-EcDTD+AlaRS-WT-50nM	AE-EcDTD+AlaRS-WT-100nM	AE-EcDTD+AlaRS-WT-500nM
0	100	100	100	100	0		0	100	100	100	100	100	100
2	99.8036	97.6253	99.3434	98.9241	1.14809		2	98.9241	40.2682	42.1004	39.7093	31.0703	24.1786
5	100.253	96.4379	94.6354	97.1086	2.868		5	97.1086	27.7081	34.5379	28.0713	18.4024	17.0463
10	98.5269	96.8107	98.6728	98.0035	1.03554		10	98.0035	22.497	21.3973	18.1237	12.0471	15.5567
15	96.7172	95.4853	99.05	97.0842	1.81047		15	97.0842	20.968	14.1033	11.2522	10.5256	13.1172
Time (min)	AE-EcDTD_1	AE-EcDTD_2	AE-EcDTD_3	Average	Std. Dev.			AE-Buffer	AE-EcDTD	AE-EcDTD+AlaRS-WT-10nM	AE-EcDTD+AlaRS-WT-50nM	AE-EcDTD+AlaRS-WT-100nM	AE-EcDTD+AlaRS-WT-500nM
0	100	100	100	100	0			0	0	0	0	0	0
2	40.1947	42.2891	38.3208	40.2682	1.98519			1.14809	1.98519	5.3456	1.91127	4.84411	2.46986
5	27.2076	30.4687	25.4479	27.7081	2.54756			2.868	2.54756	2.13097	4.56357	1.93868	1.39249
10	25.1425	17.5204	24.8282	22.497	4.31278			1.03554	4.31278	4.53845	2.82608	0.720347	2.83352
15	20.6212	23.9956	18.2872	20.968	2.86993			1.81047	2.86993	3.88172	0.852431	2.54265	4.06705
Time (min)	AE-EcDTD+AlaRS-WT-10nM_1	AE-EcDTD+AlaRS-WT-10nM_2	AE-EcDTD+AlaRS-WT-10nM_3	Average	Std. Dev.
0	100	100	100	100	0
2	47.4747	42.0424	36.784	42.1004	5.3456
5	35.1291	36.3109	32.1738	34.5379	2.13097
10	22.0118	25.5971	16.5828	21.3973	4.53845
15	18.0556	13.9583	10.2962	14.1033	3.88172
Time (min)	AE-EcDTD+AlaRS-WT-50nM_1	AE-EcDTD+AlaRS-WT-50nM_2	AE-EcDTD+AlaRS-WT-50nM_3	Average	Std. Dev.
0	100	100	100	100	0
2	40.32	37.5673	41.2406	39.7093	1.91127
5	27.98	32.6798	23.5541	28.0713	4.56357
10	16.43	21.3862	16.5549	18.1237	2.82608
15	10.99	12.2049	10.5616	11.2522	0.852431
Time (min)	AE-EcDTD+AlaRS-WT-100nM_1	AE-EcDTD+AlaRS-WT-100nM_2	AE-EcDTD+AlaRS-WT-100nM_3	Average	Std. Dev.
0	100	100	100	100	0
2	34.89	32.6992	25.6217	31.0703	4.84411
5	18.854	16.2778	20.0754	18.4024	1.93868
10	11.76	11.5146	12.8667	12.0471	0.720347
15	9.55	8.61521	13.4116	10.5256	2.54265
Time (min)	AE-EcDTD+AlaRS-WT-500nM_1	AE-EcDTD+AlaRS-WT-500nM_2	AE-EcDTD+AlaRS-WT-500nM_3	Average	Std. Dev.
0	100	100	100	100	0
2	26.385	21.5104	24.6404	24.1786	2.46986
5	15.9562	16.5677	18.615	17.0463	1.39249
10	13.5073	14.3725	18.7902	15.5567	2.83352
15	12.7918	9.2227	17.3372	13.1172	4.06705
