# Supplementary material for: Role of D-aminoacyl-tRNA deacylase beyond chiral proofreading as a cellular defense against glycine mischarging by AlaRS
Source: eLife. 2017 Mar 31;6:e24001. doi: 10.7554/eLife.24001 (PMC5409826; doi:10.7554/eLife.24001)
Supplement: Figure 4—source data 1. — DOI: http://dx.doi.org/10.7554/eLife.24001.010 [file elife-24001-fig4-data1.xlsx]

## Sheet: Figure 4C-source data 1
Figure 4C-source data 1
Time (min)	Ser Buffer	EcoAlaRS-WT_50nM	EcoAlaRS-C666A_500nM	EcoAlaRS-C666A/Q584H_500nM	EcoAlaRS-T567F/S587W/C666F_77 μM
0	100	100	100	100	100
2	98.4766	34.2827	50.9471	37.0115	77.0291
5	95.006	18.2276	36.9585	25.9107	80.103
10	90.6345	20.2278	29.9377	19.1019	84.3731
15	85.0841	17.1413	29.2224	17.605	82

## Sheet: Figure 4D-source data 1
Figure 4D-source data 1
Time (min)	Gly Buffer	EcoAlaRS-WT_50nM	EcoAlaRS-C666A_500nM	EcoAlaRS-C666A/Q584H_500nM	EcoAlaRS-T567F/S587W/C666F_77 μM
0	100	100	100	100	100
2	97.9158	23.2784	67.6947	27.0525	82.6196
5	95.8597	16.7019	61.3716	21.4195	81.1725
10	89.6634	15.8288	53.8797	20.6731	83.6828
15	84.988	14.843	47.2328	24.1374	82
