# Supplementary material for: Role of D-aminoacyl-tRNA deacylase beyond chiral proofreading as a cellular defense against glycine mischarging by AlaRS
Source: eLife. 2017 Mar 31;6:e24001. doi: 10.7554/eLife.24001 (PMC5409826; doi:10.7554/eLife.24001)
Supplement: Figure 5—source data 1. — DOI: http://dx.doi.org/10.7554/eLife.24001.012 [file elife-24001-fig5-data1.xlsx]

## Sheet: Figure 5C-source data 1
Figure 5C-source data 1
Time (hr)	33T-MG ∆alaS + EcoAlaRS-FED - no aa	33T-MG ∆alaS + EcoAlaRS-FED 3mM Gly	33T-MG ∆alaS + EcoAlaRS-FED 10mM Gly	33T-MG ∆alaS + EcoAlaRS-FED 30mM Gly	33T-MG ∆alaS + EcoAlaRS-FED- 30mM Gly+10mM L-His	33T-MG ∆alaS + EcoAlaRS-FED- 30mM Gly+10mM L-Ala
0	0	0	0	0	0	0
2	0.02	0.02	0.02	0.02	0.02	0.04
4	0.03	0.03	0.04	0.05	0.02	0.04
6	0.06	0.06	0.07	0.06	0.02	0.2
8	0.15	0.13	0.11	0.03	0.02	0.34
10	0.28	0.26	0.24	0.06	0.06	0.55
12	0.76	0.71	0.6	0.17	0.1	1.17
14	1.42	1.35	1.315	0.38	0.25	1.57
16	1.68	1.64	1.62	0.85	0.64	1.87
18	1.74	1.72	1.71	1.47	1.28	1.98
20	1.98	1.99	2.04	2.02	1.75	2.28
22	1.92	1.95	2.06	2.1	1.89	2.34
24	1.98	2	2.02	2.08	1.94	2.28

## Sheet: Figure 5D-source data 1
Figure 5D-source data 1
Time (hr)	33T'-MG ∆alaS, ∆dtd + EcoAlaRS-FED- no aa	33T'-MG ∆alaS, ∆dtd + EcoAlaRS-FED- 3mM Gly	33T'-MG ∆alaS, ∆dtd + EcoAlaRS-FED- 10mM Gly	33T'-MG ∆alaS, ∆dtd + EcoAlaRS-FED- 30mM Gly	33T'-MG ∆alaS, ∆dtd + EcoAlaRS-FED- 30mM Gly+10mM L-His	33T'-MG ∆alaS, ∆dtd + EcoAlaRS-FED- 30mM Gly+10mM L-Ala
0	0	0	0	0	0	0
2	0.06	0.02	0.02	0.03	0.02	0.03
4	0.09	0.03	0.04	0.03	0.02	0.02
6	0.25	0.09	0.03	0.02	0.03	0.11
8	0.46	0.28	0.03	0.02	0.02	0.27
10	0.94	0.66	0.05	0.02	0.05	0.46
12	1.57	1.33	0.12	0.04	0.05	1.13
14	1.69	1.56	0.31	0.03	0.06	1.49
16	1.73	1.64	0.5	0.05	0.09	1.57
18	1.7	1.72	0.97	0.05	0.16	1.75
20	1.94	1.88	1.82	0.13	0.16	2.18
22	1.86	1.99	1.98	0.26	0.2	2.26
24	1.92	2.02	1.96	0.19	0.18	2.18

## Sheet: Figure 5-figure supplement 1
Figure 5-figure supplement 1-source data 1
Time (min)	Ser Buffer	EcDTD- 50 nM	EcDTD- 500 nM	EcDTD- 5 µM
0	100	100	100	100
1	97.74	97.7976	100.617	98.1805
2	96.9627	98.6181	98.8571	97.7895
3	96.1422	98.2295	99.0677	97.9098
4	95.2641	97.4665	98.3459	94.6165
5	95.8543	96.4877	97.3233	92.3008
10	92.9178	95.005	92.3609	86.1955
