# Supplementary material for: Role of D-aminoacyl-tRNA deacylase beyond chiral proofreading as a cellular defense against glycine mischarging by AlaRS
Source: eLife. 2017 Mar 31;6:e24001. doi: 10.7554/eLife.24001 (PMC5409826; doi:10.7554/eLife.24001)
Supplement: Figure 6—source data 1. — DOI: http://dx.doi.org/10.7554/eLife.24001.016 [file elife-24001-fig6-data1.xlsx]

## Sheet: Figure 6A-source data 1
Figure 6A-source data 1
Time (min)	Buffer_1	Buffer_2	Buffer_3	Average	Std. Dev.		Time (min)	Buffer	EcDTD-5 nM	EcDTD-50 nM
0	100	100	100	100	0		0	100	100	100
2	98.0778	97.0466	97.7785	97.6343	0.53051		2	97.6343	75.9139	11.8767
5	89.5699	86.0792	90.0741	88.5744	2.17555		5	88.5744	46.6963	3.84924
10	77.5957	79.1188	81.8497	79.5214	2.15538		10	79.5214	23.3521	4.93858
15	69.7495	70.9132	72.5855	71.0827	1.42557		15	71.0827	15.1997	5.27906
Time (min)	EcDTD-5 nM_1	EcDTD-5 nM_2	EcDTD-5 nM_3	Average	Std. Dev.			Buffer	EcDTD-5 nM	EcDTD-50 nM
0	100	100	100	100	0			0	0	0
2	77.1392	70.4821	80.1204	75.9139	4.93457			0.53051	4.93457	8.05212
5	56.2964	37.8352	45.9574	46.6963	9.25274			2.17555	9.25274	1.33525
10	35.6474	14.4317	19.9772	23.3521	11.0031			2.15538	11.0031	1.00273
15	21.8437	10.0415	13.714	15.1997	6.03975			1.42557	6.03975	0.149066
Time (min)	EcDTD-50 nM_1	EcDTD-50 nM_2	EcDTD-50 nM_3	Average	Std. Dev.
0	100	100	100	100	0
2	21.1656	7.58301	6.88141	11.8767	8.05212
5	2.34098	4.32631	4.88043	3.84924	1.33525
10	4.71424	6.03448	4.06702	4.93858	1.00273
15	5.34388	5.10856	5.38474	5.27906	0.149066

## Sheet: Figure 6B-source data 1
Figure 6B-source data 1
Time (min)	Buffer_1	Buffer_2	Buffer_3	Average	Std. Dev.		Time (min)	Buffer	EcDTD-5 nM	EcDTD-50 nM
0	100	100	100	100	0		0	100	100	100
2	100.161	99.3333	99.4528	99.649	0.447202		2	99.649	89.4148	45.4074
5	99.5893	93.8947	92.3774	95.2871	3.80224		5	95.2871	83.937	33.1004
10	99.1786	85.4035	92.434	92.3387	6.88803		10	92.3387	76.6082	24.8123
15	91.6607	86.2281	87.8679	88.5856	2.78652		15	88.5856	67.7906	21.099
Time (min)	EcDTD-5 nM_1	EcDTD-5 nM_2	EcDTD-5 nM_3	Average	Std. Dev.			Buffer	EcDTD-5 nM	EcDTD-50 nM
0	100	100	100	100	0			0	0	0
2	92.1071	79.9298	96.2075	89.4148	8.46625			0.447202	8.46625	8.68606
5	89.3036	73.5263	88.9811	83.937	9.01736			3.80224	9.01736	4.79484
10	80.6607	65.5789	83.5849	76.6082	9.66286			6.88803	9.66286	6.12739
15	72.4464	59.7368	71.1887	67.7906	7.0031			2.78652	7.0031	5.40115
Time (min)	EcDTD-50 nM_1	EcDTD-50 nM_2	EcDTD-50 nM_3	Average	Std. Dev.
0	100	100	100	100	0
2	45.5179	36.6667	54.0377	45.4074	8.68606
5	28.8929	32.0877	38.3208	33.1004	4.79484
10	18.4107	25.4035	30.6226	24.8123	6.12739
15	15.3929	21.7719	26.1321	21.099	5.40115

## Sheet: Figure 6C-source data 1
Figure 6C-source data 1
Time (min)	Buffer_1	Buffer_2	Buffer_3	Average	Std. Dev.		Time (min)	Buffer	EcDTD-500 pM	EcDTD-5 nM	EcDTD-50 nM
0	100	100	100	100	0		0	100	100	100	100
2	99.7964	104.593	94.3715	99.5869	5.1139		2	99.5869	35.1841	20.5502	6.332
5	96.2484	103.015	91.7113	96.9914	5.68814		5	96.9914	5.27816	3.64895	3.33498
10	97.0918	101.973	78.897	92.6539	12.1612		10	92.6539	2.63286	2.92185	4.699
15	90.0102	97.0802	67.8508	84.9804	15.25		15	84.9804	4.43202	3.02006	4.94192
Time (min)	EcDTD-500 pM_1	EcDTD-500 pM_2	EcDTD-500 pM_3	Average	Std. Dev.			Buffer	EcDTD-500 pM	EcDTD-5 nM	EcDTD-50 nM
0	100	100	100	100	0			0	0	0	0
2	35.6987	27.0676	42.7859	35.1841	7.87181			5.1139	7.87181	15.4792	1.71172
5	7.47419	4.40341	3.95689	5.27816	1.91487			5.68814	1.91487	1.61088	1.03163
10	2.6465	2.08333	3.16873	2.63286	0.542827			12.1612	0.542827	0.312691	1.12669
15	5.2203	5.82386	2.25189	4.43202	1.91201			15.25	1.91201	1.07019	0.698029
Time (min)	EcDTD-5 nM_1	EcDTD-5 nM_2	EcDTD-5 nM_3	Average	Std. Dev.
0	100	100	100	100	0
2	3.50444	24.416	33.7301	20.5502	15.4792
5	2.18118	3.39331	5.37237	3.64895	1.61088
10	2.74829	3.28283	2.73444	2.92185	0.312691
15	4.24604	2.27273	2.54142	3.02006	1.07019
Time (min)	EcDTD-50 nM_1	EcDTD-50 nM_2	EcDTD-50 nM_3	Average	Std. Dev.
0	100	100	100	100	0
2	5.94736	4.84533	8.20331	6.332	1.71172
5	4.42053	2.36742	3.21699	3.33498	1.03163
10	5.93282	3.72475	4.43944	4.699	1.12669
15	5.4675	5.20833	4.14991	4.94192	0.698029

## Sheet: Figure 6D-source data 1
Figure 6D-source data 1
Time (min)	Gly-tRNA(Ala)-Buffer	EcDTD-5pM_1	EcDTD-5pM_2	EcDTD-5pM_3	Average	Std. Dev
0	100	100	100	100	100	0
2	100	75.9747	62.7624	68.7609	69.166	6.61547
5	99.3528	51.5785	41.1997	48.603	47.1271	5.34452
10	98.532	28	26.5193	31.1129	28.5441	2.3446
15	98.8003	25.1776	19.0213	18.5951	20.9313	3.68353

## Sheet: Figure 6-figure supplement 1
Figure 6-figure supplement 1-source data 1
Time (min)	Gly-tRNA(Gly)-Buffer	EcDTD-5nM_1	EcDTD-5nM_2	EcDTD-5nM_3	Average	Std. Dev
0	100	100	100	100	100	0
2	100	59.1219	58.0336	56.6316	57.929	1.24844
5	97.0854	33.3149	34.2557	25.2536	30.9414	4.94815
10	95.2592	15.6982	11.5846	13.8166	13.6998	2.0593
15	96.5136	10.7176	4.98063	5.92142	7.20654	3.07682
