# Supplementary material for: Role of D-aminoacyl-tRNA deacylase beyond chiral proofreading as a cellular defense against glycine mischarging by AlaRS
Source: eLife. 2017 Mar 31;6:e24001. doi: 10.7554/eLife.24001 (PMC5409826; doi:10.7554/eLife.24001)
Supplement: Figure 7—source data 1. — DOI: http://dx.doi.org/10.7554/eLife.24001.019 [file elife-24001-fig7-data1.xlsx]

## Sheet: Figure 7A-source data 1
Figure 7A-source data 1
Time (min)	Ec-Buffer_1	AE-Buffer_2	AE-Buffer_3	Average	Std. Dev.		Time (min)	Ec-Buffer	EcDTD	PfDTD	LmDTD	DmDTD	DrDTD
0	100	100	100	100	0		0	100	100	100	100	100	100
2	97.243	97.1391	93.4479	95.9434	2.16173		2	95.9434	16.0773	8.67698	24.3715	9.60361	9.66504
5	95.4229	92.2121	78.6241	88.753	8.91764		5	88.753	9.10057	13.3501	9.49811	3.28087	7.38371
10	96.3464	87.444	76.1401	86.6435	10.1269		10	86.6435	7.73175	8.46505	14.4382	6.76197	5.79706
15	91.0466	85.444	68.2322	81.5743	11.8893		15	81.5743	8.71736	8.72766	6.79902	3.83781	8.29607
Time (min)	EcDTD_1	EcDTD_2	EcDTD_3	Average	Std. Dev.			Ec-Buffer	EcDTD	PfDTD	LmDTD	DmDTD	DrDTD
0	100	100	100	100	0			0	0	0	0	0	0
2	4.02837	16.86	27.3435	16.0773	11.6773			2.16173	11.6773	5.08505	18.2924	6.43337	4.43618
5	3.62687	9.03	14.6448	9.10057	5.50932			8.91764	5.50932	8.15252	5.88869	1.13468	4.90321
10	2.82388	7.77	12.6014	7.73175	4.88886			10.1269	4.88886	5.14696	9.15139	3.45081	3.48387
15	5.09904	8.03	13.023	8.71736	4.00646			11.8893	4.00646	5.85877	3.74694	1.87287	5.33704
Time (min)	PfDTD_1	PfDTD_2	PfDTD_3	Average	Std. Dev.
0	100	100	100	100	0
2	3.66702	8.53	13.8339	8.67698	5.08505
5	5.23287	13.28	21.5375	13.3501	8.15252
10	3.34582	8.41	13.6393	8.46505	5.14696
15	2.77034	8.93	14.4826	8.72766	5.85877
Time (min)	LmDTD_1	LmDTD_2	LmDTD_3	Average	Std. Dev.
0	100	100	100	100	0
2	5.39347	25.83	41.891	24.3715	18.2924
5	3.61349	9.49	15.3909	9.49811	5.88869
10	5.24625	14.52	23.5485	14.4382	9.15139
15	3.17184	6.57	10.6552	6.79902	3.74694
Time (min)	DmDTD_1	DmDTD_2	DmDTD_3	Average	Std. Dev.
0	100	100	100	100	0
2	3.06478	9.82	15.926	9.60361	6.43337
5	2.44914	2.82	4.57347	3.28087	1.13468
10	3.50642	6.4	10.3795	6.76197	3.45081
15	2.10118	3.59	5.82225	3.83781	1.87287
Time (min)	DrDTD_1	DrDTD_2	DrDTD_3	Average	Std. Dev.
0	100	100	100	100	0
2	5.66113	8.9	14.434	9.66504	4.43618
5	2.40899	7.53	12.2121	7.38371	4.90321
10	2.34208	5.74	9.30911	5.79706	3.48387
15	2.91756	8.38	13.5907	8.29607	5.33704

## Sheet: Figure 7B-source data 1
Figure 7B-source data 1
Time (min)	Dm-Buffer_1	Dm-Buffer_2	Dm-Buffer_3	Average	Std. Dev.		Time (min)	Dm-Buffer	EcDTD	PfDTD	LmDTD	DmDTD	DrDTD
0	100	100	100	100	0		0	100	100	100	100	100	100
2	94.3515	94.5907	92.243	93.7284	1.2919		2	93.7284	15.9459	15.3607	13.5263	12.0851	15.5193
5	90.2686	75.3909	85.4229	83.6941	7.58805		5	83.6941	12.6748	11.4066	10.2193	12.5964	10.9498
10	82.0875	70.6014	89.3464	80.6784	9.45161		10	80.6784	12.1424	10.9921	11.2317	10.1761	12.2255
15	76.3008	66.5375	81.0466	74.6283	7.39775		15	74.6283	11.0239	7.94201	6.93126	10.2421	12.1045
Time (min)	EcDTD_1	EcDTD_2	EcDTD_3	Average	Std. Dev.			Dm-Buffer	EcDTD	PfDTD	LmDTD	DmDTD	DrDTD
0	100	100	100	100	0			0	0	0	0	0	0
2	20.4298	10.3795	17.0284	15.9459	5.11183			1.2919	5.11183	5.64171	1.01462	8.09417	7.11286
5	4.7736	14.6241	18.6269	12.6748	7.12937			7.58805	7.12937	5.94079	5.37561	3.47453	3.56019
10	7.02993	16.5735	12.8239	12.1424	4.80812			9.45161	4.80812	5.07499	5.61047	4.87433	3.55624
15	6.53876	11.434	15.099	11.0239	4.29485			7.39775	4.29485	4.26026	1.82876	7.83596	5.87385
Time (min)	PfDTD_1	PfDTD_2	PfDTD_3	Average	Std. Dev.
0	100	100	100	100	0
2	10.7598	21.6552	13.667	15.3607	5.64171
5	5.09593	16.891	12.2329	11.4066	5.94079
10	5.41827	12.2121	15.3458	10.9921	5.07499
15	4.7122	6.3435	12.7703	7.94201	4.26026
Time (min)	LmDTD_1	LmDTD_2	LmDTD_3	Average	Std. Dev.
0	100	100	100	100	0
2	14.3515	13.8339	12.3935	13.5263	1.01462
5	4.02149	13.023	13.6135	10.2193	5.37561
10	6.13968	10.3091	17.2463	11.2317	5.61047
15	6.79969	8.82225	5.17184	6.93126	1.82876
Time (min)	DmDTD_1	DmDTD_2	DmDTD_3	Average	Std. Dev.
0	100	100	100	100	0
2	3.54566	19.6448	13.0648	12.0851	8.09417
5	9.70069	11.6393	16.4491	12.5964	3.47453
10	4.57406	13.4479	12.5064	10.1761	4.87433
15	3.69916	18.926	8.10118	10.2421	7.83596
Time (min)	DrDTD_1	DrDTD_2	DrDTD_3	Average	Std. Dev.
0	100	100	100	100	0
2	7.30622	19.5907	19.6611	15.5193	7.11286
5	6.89179	13.5485	12.409	10.9498	3.56019
10	9.19417	16.1401	11.3421	12.2255	3.55624
15	10.9133	18.4826	6.91756	12.1045	5.87385
